# Supplementary material
Source: Research Square preprint supplement (doi:10.21203/rs.3.rs-9194600/v1)
Supplement: Supplementary file 1 [file 646c4261caa79a7003fcdd32.docx]

***Online Supplements for：***

**Two Sides of the Same Coin: Uncovering Differential Roles of Cognitive and Affective Empathy in Adolescent Multidimensional Well-Being Network**

**List of Appendix Contents:**

- **Table S1.** Centrality indices of the empathy network in study1
- **Table S2.** Centrality indices of the item-level empathy network in study1
- **Table S3.** Edge coefficients of key variables of item-level empathy network in Study 1
- **Table S****4.** Confirmatory Factor Analysis in Study 2
- **Table S5.** Model comparisons in Study 2
- **Table S6.** Model comparisons in Study 2
- **Table S7.** Centrality indices of the cognitive empathy and well-being network in study2
- **Table S8.** Centrality indices of the affective empathy and well-being network in study2
- **Figure S1.** Accuracy and stability estimation of empathy network in study 1
- **Figure S2.** Cross-sectional network analysis of item-level empathy
- **Figure S3.** Accuracy and stability estimation of item-level empathy network in study 1

# Table S1. Centrality indices of the empathy network in study1.

| Variables | Expected Influence |
| --- | --- |
| Autonomy | -0.891 |
| Clear Thinking | -0.128 |
| Competence | 1.134 |
| Emotional Stability | -0.576 |
| Empathy | -2.688 |
| Engagement | 0.873 |
| Meaning | 0.152 |
| Optimism | 1.422 |
| Positive Emotions | 0.808 |
| Positive Relationships | -0.742 |
| Prosocial Behavior | 0.372 |
| Resilience | -0.259 |
| Self-Acceptance | 0.013 |
| Self-Esteem | 0.247 |
| Vitality | 0.263 |

# Table S2. Centrality indices of the item-level empathy network in study1.

| Variables | Expected Influence |
| --- | --- |
| Autonomy | -0.565 |
| Clear Thinking | 0.165 |
| Competence | -0.387 |
| Emotional Stability | -0.221 |
| Empathy_Item 1 | -0.768 |
| Empathy_Item 2 | -1.971 |
| Empathy_Item 3 | -2.423 |
| Empathy_Item 4 | 0.919 |
| Engagement | 0.263 |
| Meaning | 0.731 |
| Optimism | -0.149 |
| Positive Emotions | -0.069 |
| Positive Relationships | -0.565 |
| Prosocial Behavior | 0.165 |
| Resilience | -0.387 |
| Self-Acceptance | -0.221 |
| Self-Esteem | -0.768 |
| Vitality | -1.971 |

*Note:* Empathy_Item 1 = ”My heart goes out to people who are unhappy.”; Empathy_Item 2 = ”I feel others’ emotions.”; Empathy_Item 3 = ”Other people’s misfortunes usually disturb me a great deal.”; Empathy_Item 4 = ”I easily get caught up in other people’s feelings.”.

Table S3. Edge coefficients of key variables of item-level empathy network in Study 1.

|  | AU | CT | CO | ES | EN | ME | OP | PE | PR | PB | RE | SA | SE | VI |
| --- | --- | --- | --- | --- | --- | --- | --- | --- | --- | --- | --- | --- | --- | --- |
| Empathy_Item1 | – | 0.034 | – | – | 0.038 | – | – | – | 0.085 | 0.293 | – | – | – | 0.002 |
| Empathy_Item2 | 0.008 | 0.098 | 0.020 | 0.016 | 0.023 | 0.007 | – | -0.011 | 0.120 | 0.164 | – | 0.030 | 0.009 | – |
| Empathy_Item3 | – | – | – | – | – | – | – | -0.025 | – | 0.119 | 0.031 | -0.020 | -0.004 | – |
| Empathy_Item4 | – | -0.038 | 0.010 | -0.023 | – | -0.007 | -0.023 | – | 0.022 | 0.072 | -0.032 | -0.014 | 0.014 | -0.002 |

*Note:*Only non-zero edges retained by the LASSO are displayed in the table. In the study 2, black represent the edges parameters from empathy to other well-being variables, and and red represent edges parameters in the opposite direction.

Empathy_Item1 = ”My heart goes out to people who are unhappy.”; Empathy_Item2 = ”I feel others’ emotions.”; Empathy_Item3 = ”Other people’s misfortunes usually disturb me a great deal.”; Empathy_Item4 = ”I easily get caught up in other people’s feelings.

Table S4. Confirmatory Factor Analysis in Study 2.

| Model |  | CFI | TLI | RMSEA | SRMR |
| --- | --- | --- | --- | --- | --- |
| T1_Single-Factor Model (Model 1) | 6.464 | 0.910 | 0.888 | 0.096 | 0.072 |
| T1_ Two-Factor Model (Model 2) | 3.549 | 0.961 | 0.948 | 0.066 | 0.047 |
| T2_Single-Factor Model (Model 1) | 11.389 | 0.867 | 0.834 | 0.133 | 0.085 |
| T2_Two-Factor Model (Model 2) | 3.079 | 0.976 | 0.967 | 0.060 | 0.044 |

Table S5. Model comparisons in Study 2.

Sample of Time 1

| Model | df | AIC | BIC | Chisq | Chisq diff | RMSEA diff | df diff | Pr(>Chisq) |
| --- | --- | --- | --- | --- | --- | --- | --- | --- |
| Single-Factor Model | 41 | 23586 | 23696 | 145.52 | – | – | – | – |
| Two-Factor Model | 44 | 23719 | 23816 | 284.42 | – | – | – | – |
| Model diff | – | – | – | – | 138.9​ | 0.2778 | 3 | < 2.2e-16 *** |

***Note:*** *** *p <* 0.001.

Table S6. Model comparisons in Study 2.

Sample of Time 2

| Model | df | AIC | BIC | Chisq | Chisq diff | RMSEA diff | df diff | Pr(>Chisq) |
| --- | --- | --- | --- | --- | --- | --- | --- | --- |
| Single-Factor Model | 39 | 22547 | 22665 | 120.10 | – | – | – | – |
| Two-Factor Model | 44 | 22918 | 23015 | 501.13 | – | – | – | – |
| Model diff | – | – | – | – | 381.03 | 0.35794 | 5 | < 2.2e-16 *** |

*Note:* *** p < 0.001.

# Table S7. Centrality indices of the cognitive empathy and well-being network in study2.

| Variables | Out-Prediction | In-Prediction |
| --- | --- | --- |
| Autonomy | 0.174 | 0.094 |
| Clear Thinking | 0.030 | 0.137 |
| Competence | 0.000 | 0.316 |
| Emotional Stability | 0.041 | 0.076 |
| Cognitive Empathy | 0.009 | 0.057 |
| Engagement | 0.010 | 0.355 |
| Meaning | 0.023 | 0.189 |
| Optimism | 0.192 | 0.177 |
| Positive Emotions | 0.004 | 0.209 |
| Positive Relationships | 0.008 | 0.132 |
| Prosocial Behavior | 0.050 | 0.014 |
| Resilience | 0.002 | 0.260 |
| Self-Acceptance | 0.005 | 0.329 |
| Self-Esteem | 0.019 | 0.227 |
| Vitality | 0.101 | 0.174 |

# Table S8. Centrality indices of the affective empathy and well-being network in study2.

| Variables | Out-Prediction | In-Prediction |
| --- | --- | --- |
| Autonomy | 0.182 | 0.098 |
| Clear Thinking | 0.028 | 0.158 |
| Competence | 0.000 | 0.301 |
| Emotional Stability | 0.052 | 0.076 |
| Affective Empathy | 0.029 | 0.051 |
| Engagement | 0.014 | 0.362 |
| Meaning | 0.023 | 0.182 |
| Optimism | 0.184 | 0.153 |
| Positive Emotions | 0.008 | 0.211 |
| Positive Relationships | 0.011 | 0.144 |
| Prosocial Behavior | 0.089 | 0.011 |
| Resilience | 0.006 | 0.280 |
| Self-Acceptance | 0.008 | 0.378 |
| Self-Esteem | 0.025 | 0.226 |
| Vitality | 0.106 | 0.182 |


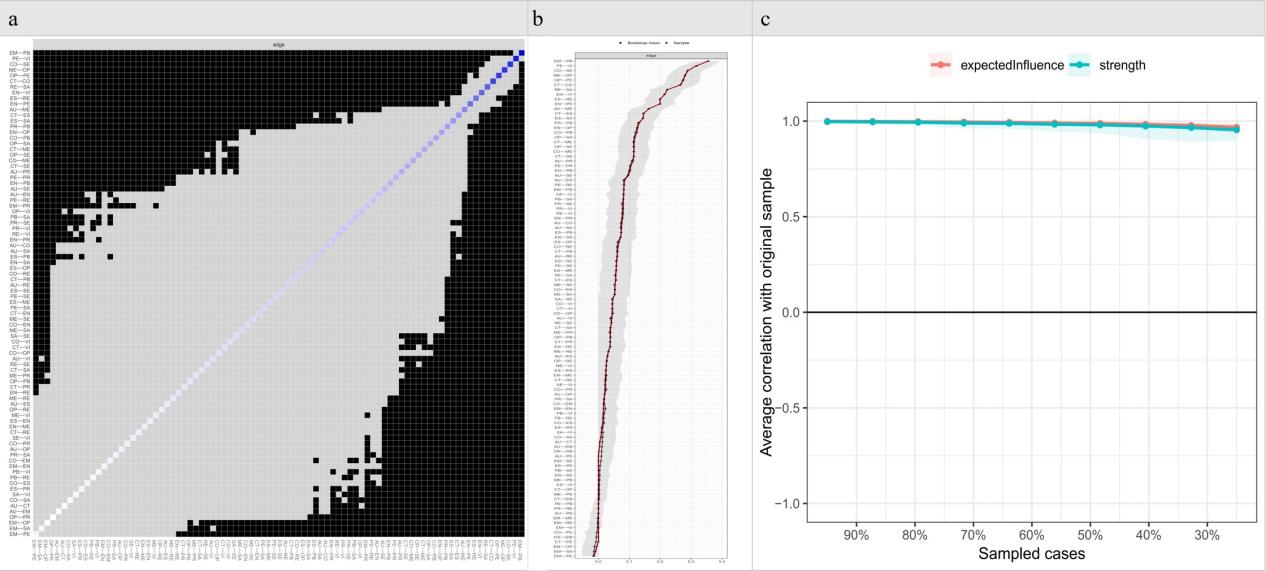


**Figure S1.** Accuracy and stability estimation of empathy network in study 1.(a) Nonparametric bootstrapped difference test for edges. Gray boxes indicate no significant difference, whereas black boxes indicate statistically significant difference (p < 0.05). Diagonal values represent the strength score of each node. (b) The confidence intervals around the edge-weight estimates. (c) Average correlation with the original sample.

*Note:* Symptom label descriptions: AU = Autonomy; CT = Clear Thinking; CO = Competence; ES = Emotional Stability; EM = Empathy; EN = Engagement; ME = Meaning; OP = Optimism; PE = Positive Emotions; PR = Positive Relationships; PB = Prosocial Behavior; RE = Resilience; SA = Self-Acceptance; SE = Self-Esteem; VI = Vitality.


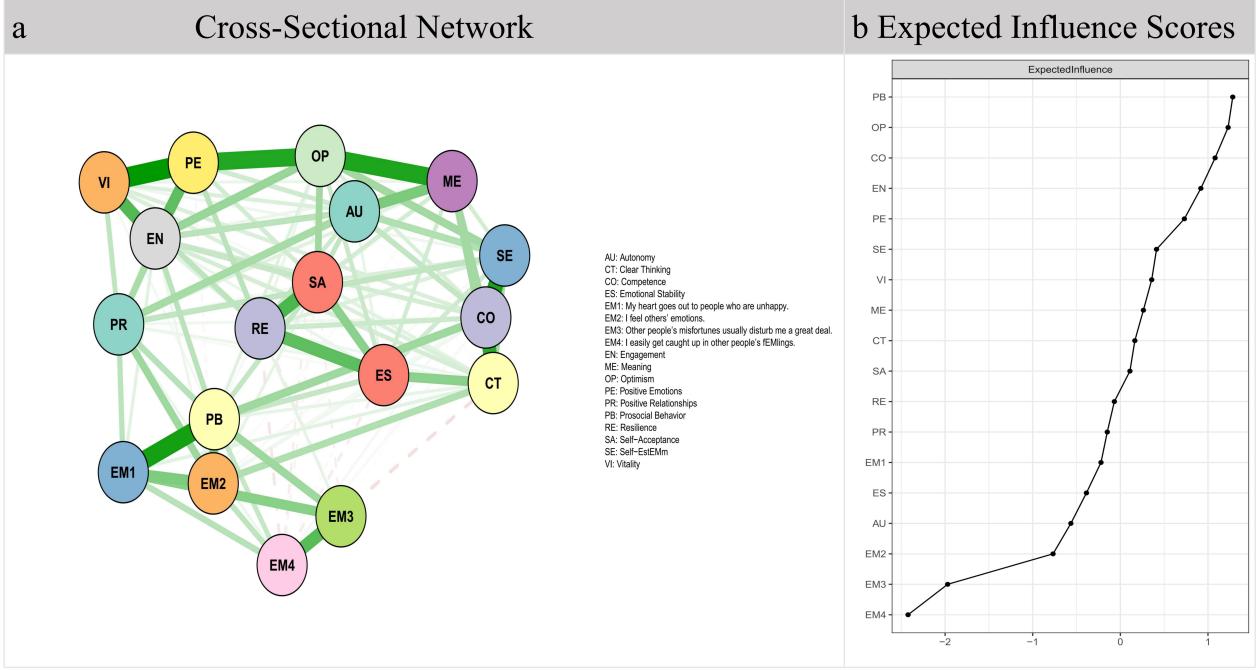


**Figure S2.** Cross-sectional network analysis of item-level empathy**.**

*Note:* (a) Cross-sectional network of item-level empathy networks and other Well-Being nodes. (b) The expected influence centrality indices, shown as standardized z scores.


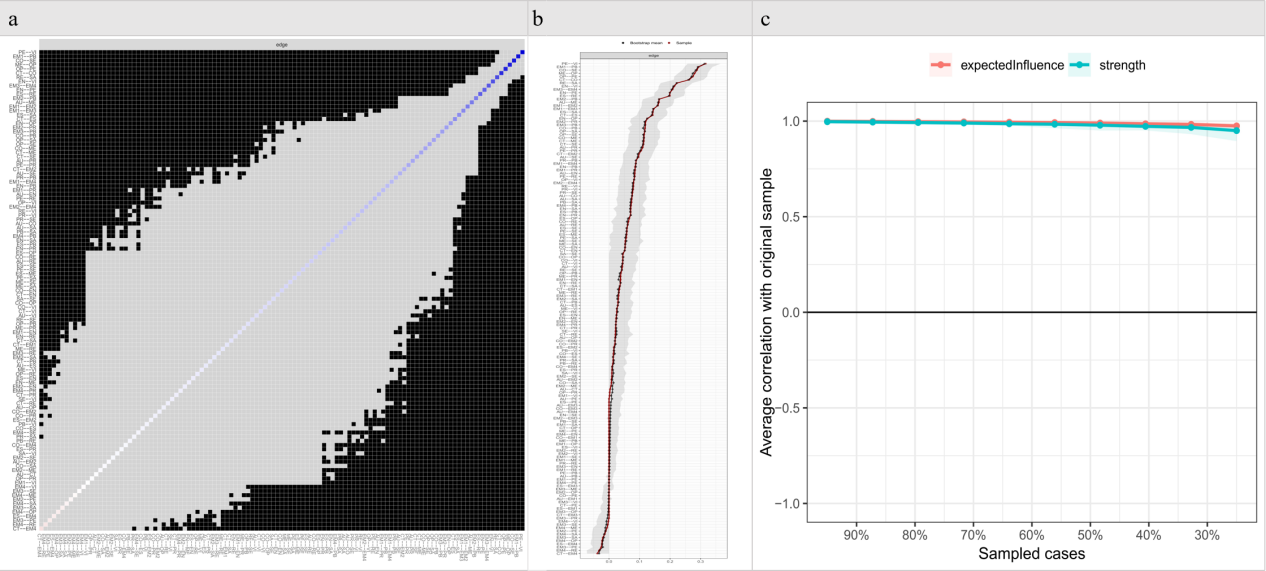


**Figure S3.** Accuracy and stability estimation of item-level empathy network in study 1.(a) Nonparametric bootstrapped difference test for edges. Gray boxes indicate no significant difference, whereas black boxes indicate statistically significant difference (p < 0.05). Diagonal values represent the strength score of each node. (b) The confidence intervals around the edge-weight estimates. (c) Average correlation with the original sample.

*Note:* Symptom label descriptions: AU = Autonomy; CT = Clear Thinking; CO = Competence; ES = Emotional Stability; EM = Empathy; EN = Engagement; ME = Meaning; OP = Optimism; PE = Positive Emotions; PR = Positive Relationships; PB = Prosocial Behavior; RE = Resilience; SA = Self-Acceptance; SE = Self-Esteem; VI = Vitality.
